# Supplementary material
Source: publisher figshare collection journal article supplement (https://tandf.figshare.com/ndownloader/files/18715721)
Supplement: Supplementary file 1 [file 18715721]

| **Supplementary Table 1.** Nomenclature of *ACO*s and primer sequences used in RT-PCR | | |
| --- | --- | --- |
| **AGI** | **Name** | **Primer Sequence** |
| At2g19590 | *ACO1* | For: 5′-AGAGAGATGGAGATTCCAGTTATTG-3′ |
| Rev: 5-GAGTGAAGTAGTATAGCTGAATCAG-3′ |
| At1g62380 | *ACO2* | For: 5′-GATGAATACAGGACGGCCATGAAAGAC-3′ |
| Rev: 5-CATCTTCCATAAACATAAACACCCCACAC-3′ |
| At1g03400 | *ACO3* | For: 5′-GCAATGGAGTCAACTGATCGTTCAAGTC-3′ |
| Rev: 5-GGTGTAACTTAGGAGCATCGAGCG-3′ |
| At1g05010 | *ACO4/EFE* | For: 5′-CTCGACGACGATTACAGAACGTTAATG-3′ |
| Rev: 5-GAACTCTACGAACAGAAAACATTAATTCCC-3′ |
| At1g12010 | *ACO5* | For: 5′-GACTTGTCTAAGCTCAATGGTGAAGAGAG-3′ |
| Rev: 5-CAACCACAGCCACCGGATTCAAATC-3′ |
| At1g77330 | *ACO6* | n.a. |
| n.a. |
| At2g25450 | *ACO7* | For: 5′-CTATGGCGGAAAACTACGACCGTG-3′ |
| Rev: 5-CTAGCCACATAGTGATTGGAGGATTCC-3′ |
| At2g30830 | *ACO8* | n.a. |
| n.a. |
| At2g30840 | *ACO9* | For: 5′-ATGGAAGCAACATACGATCGTGCTAGTG-3′ |
| Rev: 5-CGGAACAATCAAGTGAAACTGTAGAAGACC-3′ |
| At3g47190 | *ACO10* | For: 5′-CTTTCCGAGTGGTGATGGAGGAATATG-3′ |
| Rev: 5-CCTTGCAAATACAAAAGTTTTGCCATGC-3′ |
| At3g61400 | *ACO11* | For: 5′-ATGGATTCAACAGCCACCGTTGCAAG-3′ |
| Rev: 5-GATCTCTAAACGGAGTAACGCAGAGG-3′ |
| At5g43440 | *ACO12* | For: 5′-CTGCAGAACTCGTTCGTTTGAACGAAC-3′ |
| Rev: 5-GCGATTTTCCATCGAAGATGCTTGCTAG-3′ |
| At5g43450 | *ACO13* | For: 5′-CTCGACGAAGACAGGAGTGAAAGGAC-3′ |
| Rev: 5-CAATGGTTGAGGAACTCTATAGCGGGT-3′ |
| n.a., Not analyzed. | | |

| **Supplementary Table 2.** Primer sequences used for vector constructs and EMSA | |
| --- | --- |
| **Primer name** | **Primer Sequence** |
| *ProACO1:GUS 1843* For | 5´-**AAGCTT**CTCTTTCCGGTGGTTGGAGAAC-3´ |
|
| *ProACO1:GUS 1154* For | 5´-**AAGCTT**CAATAACATTACCATTTCTTCCTC-3´ |
|
| *ProACO1:GUS 769* For | 5´-**AAGCTT**GTGTAGTACTCCGGTAATCTC-3´ |
|
| *ProACO1:GUS 536* For | 5´-**AAGCTT**AGATGGGTAGTTTAGTGAAGTT-3´ |
|
| *ProACO1:GUS 184* For | 5´-**AAGCTT**CAAATTCAATGAGTTAACAGAATA-3´ |
|
| *ProACO1:GUS 1* Rev | 5´-**GGATCC**TCTTTTTTATTTACTTTTTCTCACACAC-3´ |
|
| *ProACO1:GUS -312* Rev | 5´-**GGATCC**ATAATTTCTTAATGGTTTTGGGTCACT-3´ |
|
|
| Probe A | For: 5′-GTAACATATTACAACACCAAATGACCAAAA-3′ |
| Rev: 5-CTTTTGTTTTGGTCATTTGGTGTTGTAATA-3′ |
| Probe B | For: 5′-TTCTATTGCAAATGGTGTGTAGTACTCCGG-3′ |
| Rev: 5-AGTACTACACACCATTTGCAATAGAAAAAG-3′ |
| Probe C | For: 5′-GGGTCATATTATCATTTGATGAGTGTTATA-3′ |
| Rev: 5-GCTCTATAACACTCATCAAATGATAATATG-3′ |
| Probe D | For: 5′-GAAAAATTCAAAAACTTGTGATCACATGG-3′ |
| Rev: 5-GTCCATACAACCATGTGATCACAAGTTTTTGAATT-3′ |
| Probe mA | For: 5′-GTAACATATTACAACACTCTGAAACCAAAA-3′ |
| Rev: 5-CTTTTGTTTTGGTTTCAGAGTGTTGTAATA-3′ |
| Probe mB | For: 5′-TTCTATTGTCTGAAGTGTGTAGTACTCCGG-3′ |
| Rev: 5-AGTACTACACACTTCAGACAATAGAAAAAG-3′ |
| Probe mD | For: 5′-GAAAAATTCAAAAACTTGTGATTCTGAAGTTG-3′ |
| Rev: 5-GTCCATACAACTTCAGAATCACAAGTTTTTGAATT-3′ |
